# Supplementary material for: Yttrium aluminum garnet fluorescent conversion films for solid-state lighting: interface reaction synthesis strategy and modulation of warm white light
Source: Royal Society of Chemistry journal article supplement (doi:10.1039/d4dt03316g), 2025-01-01
Supplement: d4dt03316g1.pdf [file d4dt03316g1.pdf]

## Support information

### **Yttrium aluminum garnet fluorescent conversion film for solid-state lighting: interface reaction synthesis strategy and modulation of warm white light**

Haoxuan Zeng,<sup>a</sup> Taihui Chen,<sup>a</sup> Yongping Guo,<sup>a</sup> Xiaoli Wu<sup>\*a, b, c</sup>

a. College of Materials Science and Engineering, Guilin University of Technology, Guilin 541004, People's Republic of China

b. Guangxi Key Laboratory of Optical and Electronic Materials and Devices, Guilin University of Technology, Guilin 541004, People's Republic of China

c. Collaborative Innovation Center for Exploration of Nonferrous Metal Deposits and Efficient Utilization of Resources in Guangxi; Guilin University of Technology, Guilin 541004, China

**Table S1.** Reactions between precursors and sapphire occurring at different ranges of temperature.

| Temperature | Reaction                                                                                    |
|-------------|---------------------------------------------------------------------------------------------|
| 900—1000°C  | $2\text{Y}_2\text{O}_3 + \text{Al}_2\text{O}_3 \rightarrow \text{Y}_4\text{Al}_2\text{O}_9$ |
| 1000—1100°C | $\text{Y}_4\text{Al}_2\text{O}_9 + \text{Al}_2\text{O}_3 \rightarrow 4\text{YAlO}_3$        |
| 1100—1550°C | $3\text{YAlO}_3 + \text{Al}_2\text{O}_3 \rightarrow \text{Y}_3\text{Al}_5\text{O}_{12}$     |

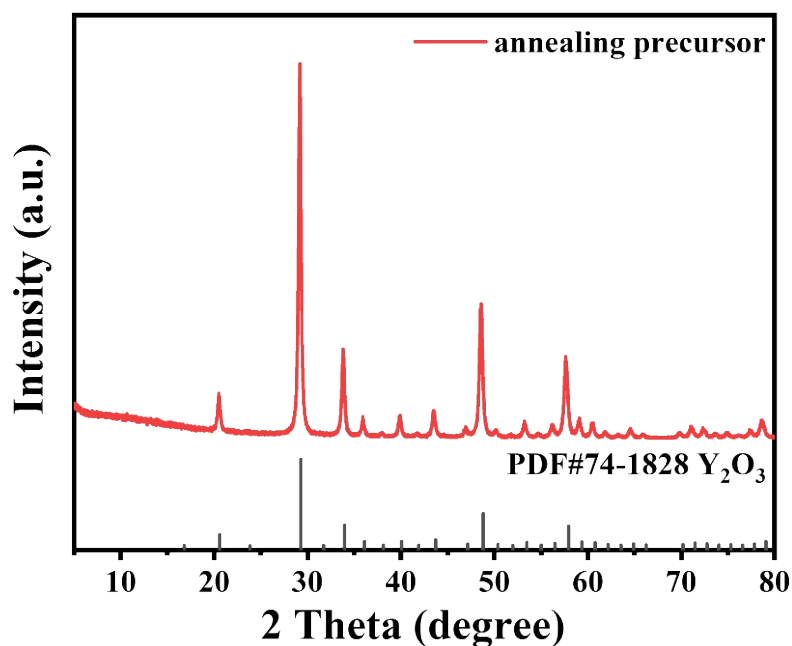

**Fig. S1** XRD patterns of the precursor calcined at 630 °C.

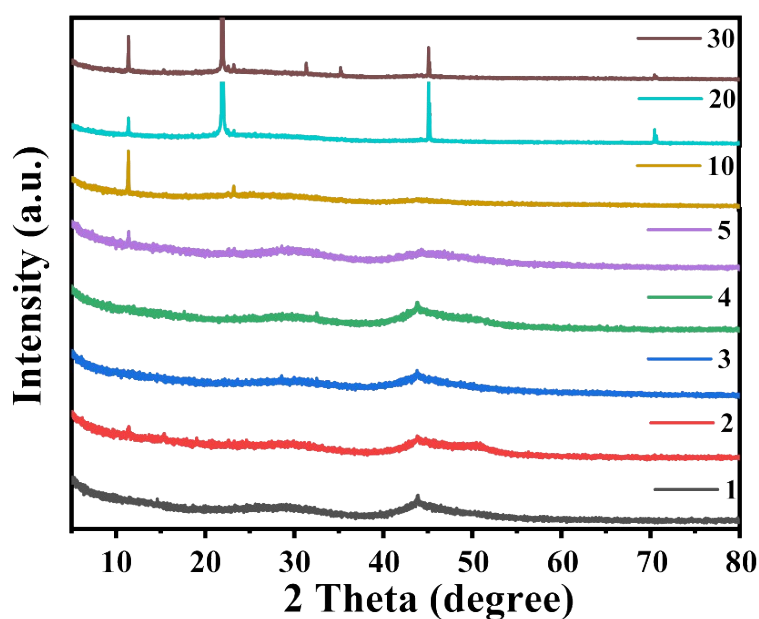

**Fig. S2** XRD patterns of the precursors at different molar ratios of urea/ $\text{Y}(\text{NO}_3)_3$  preparation.

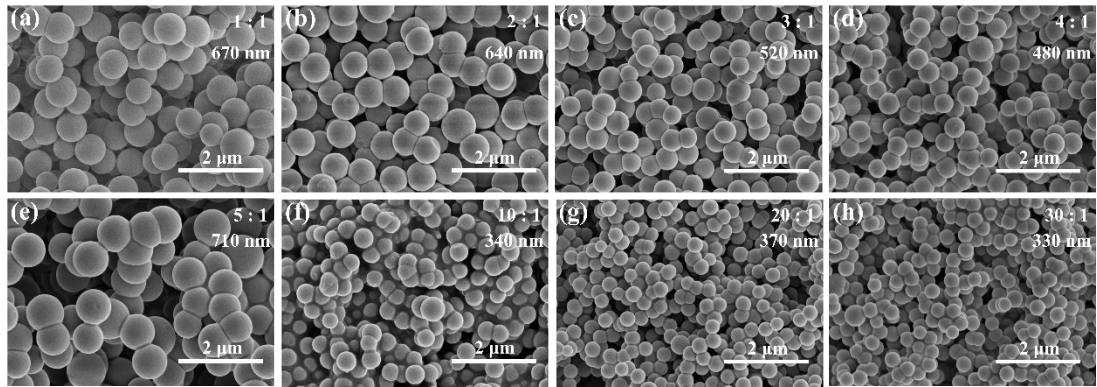

**Fig. S3** SEM images of the precursors prepared with different R values: R=1(a), R=2(b), R=3(c), R=4(d), R=5(e), R=10(f), R=20(g) and R=30 (h).

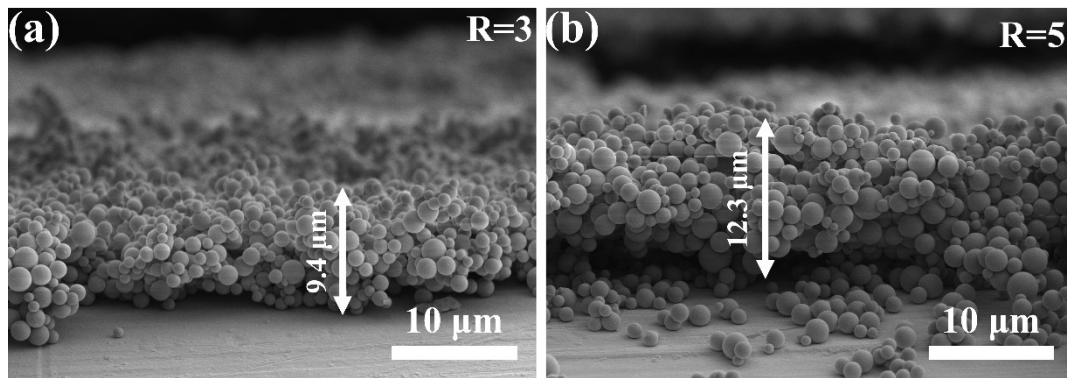

**Fig. S4** Cross-section images the precursors at different R value: R=3(a), R=5(b).

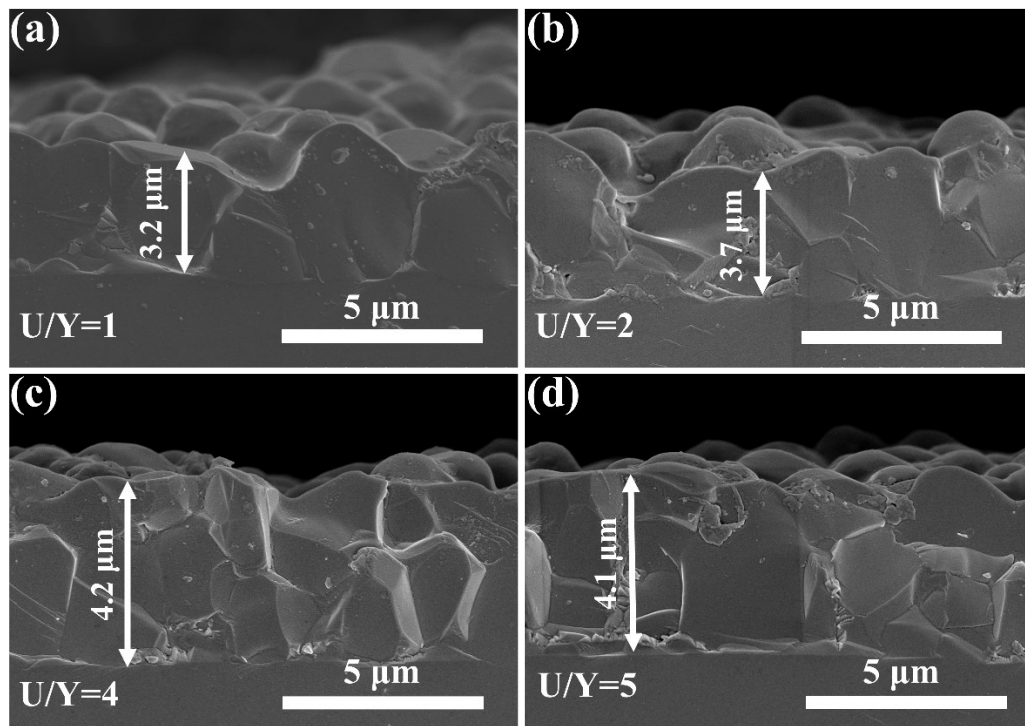

**Fig. S5** Cross-section images the transparent polycrystalline films at different R value preparation.

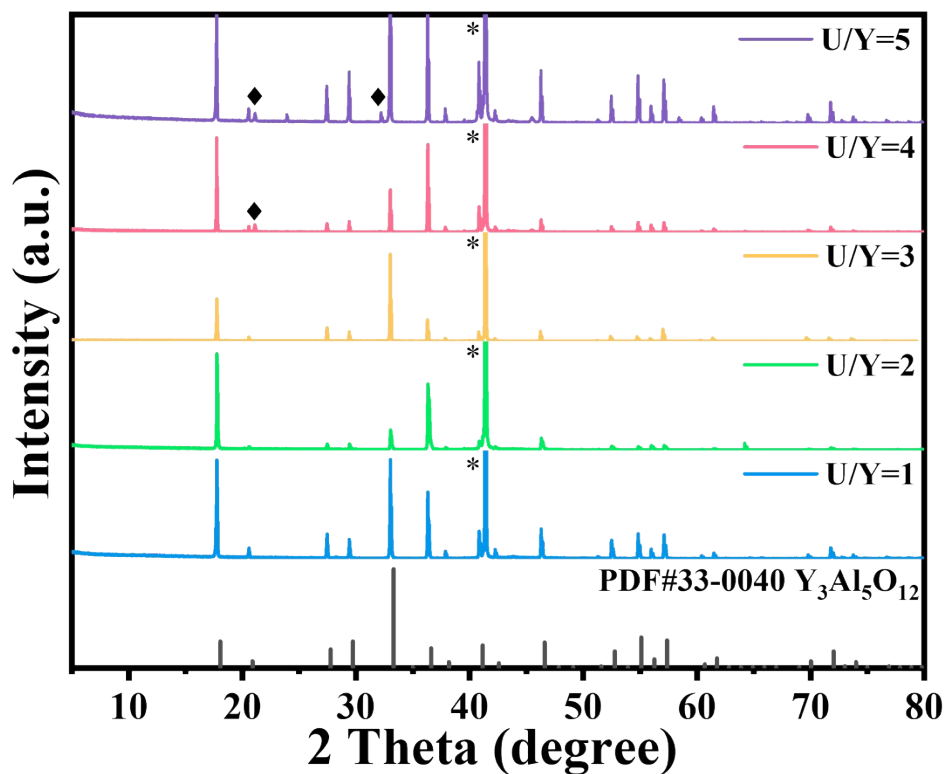

Fig. S6 XRD patterns of annealing films after interfacial reaction with different R value. The peaks marked by \* are from Sapphire substrate

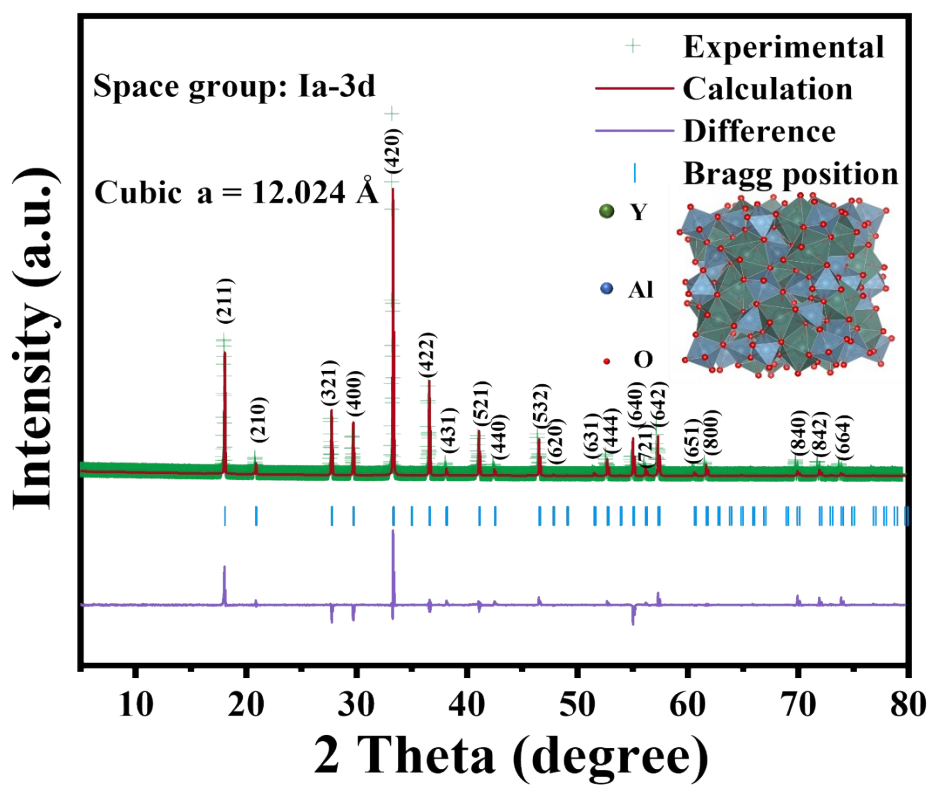

Fig. S7 Rietveld refinements of the transparent polycrystalline film calcined at 1550 °C

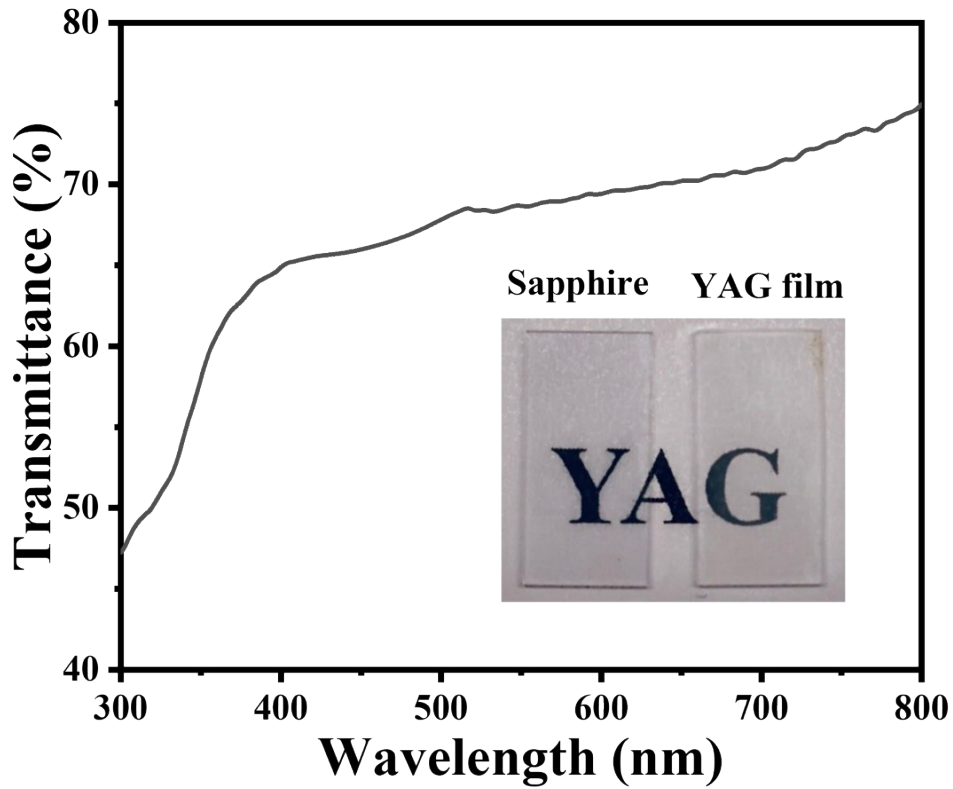

Fig. S8 Transmittance spectrum of YAG transparent polycrystalline films with R = 3.

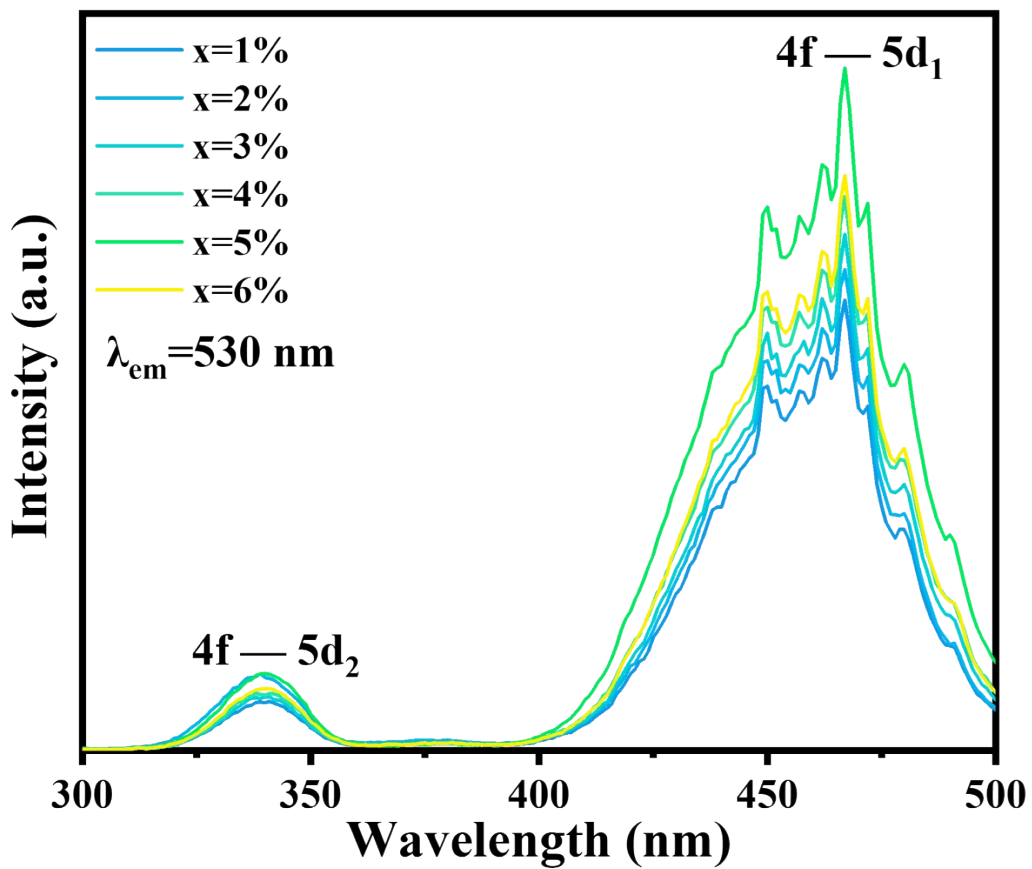

Fig. S9 The PLE spectra of the YAG: xCe polycrystalline films

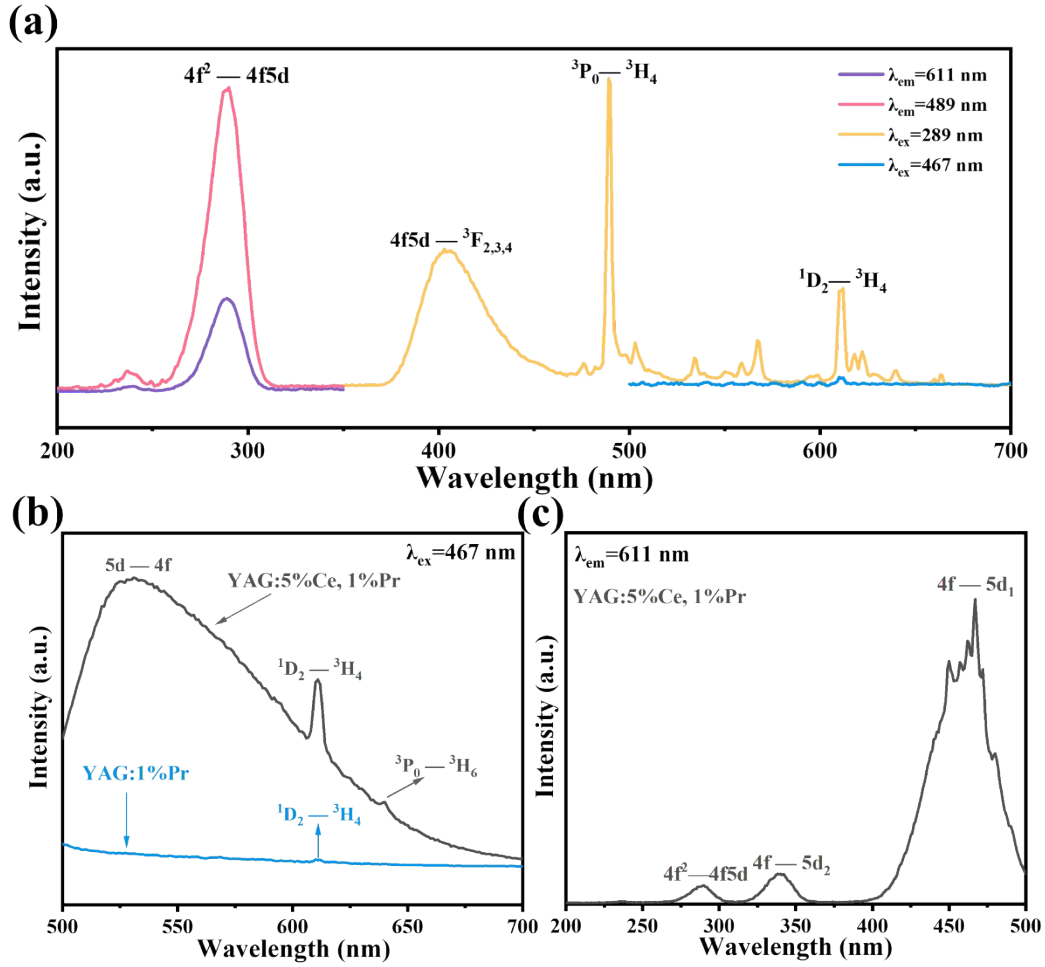

Fig. S10 The PLE and PL spectra of YAG: 1%Pr film (a) and YAG: 5%Ce, 1%Pr (b-c).

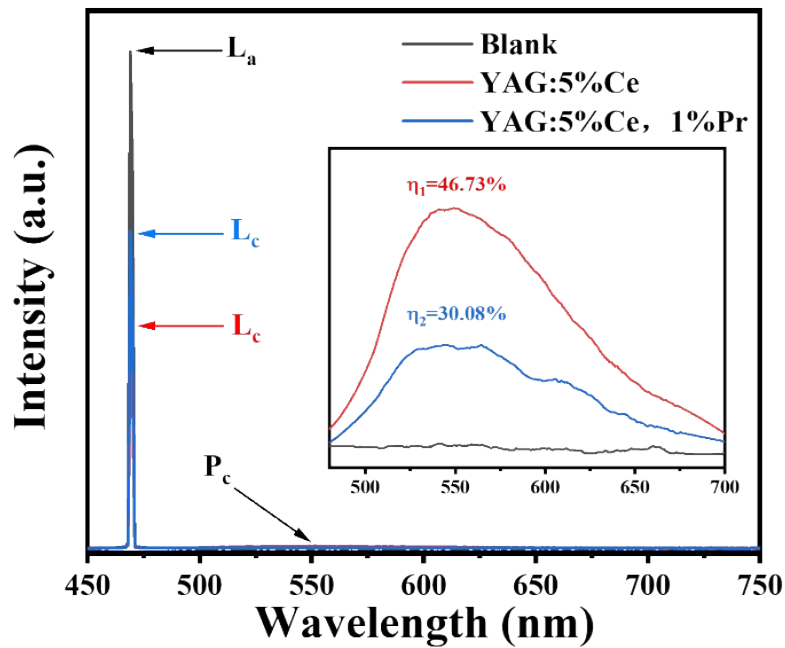

Fig. S11 PL spectra measured in an integrating sphere with air as reference and YAG: RE (RE=Ce, Pr) transparent polycrystalline films.

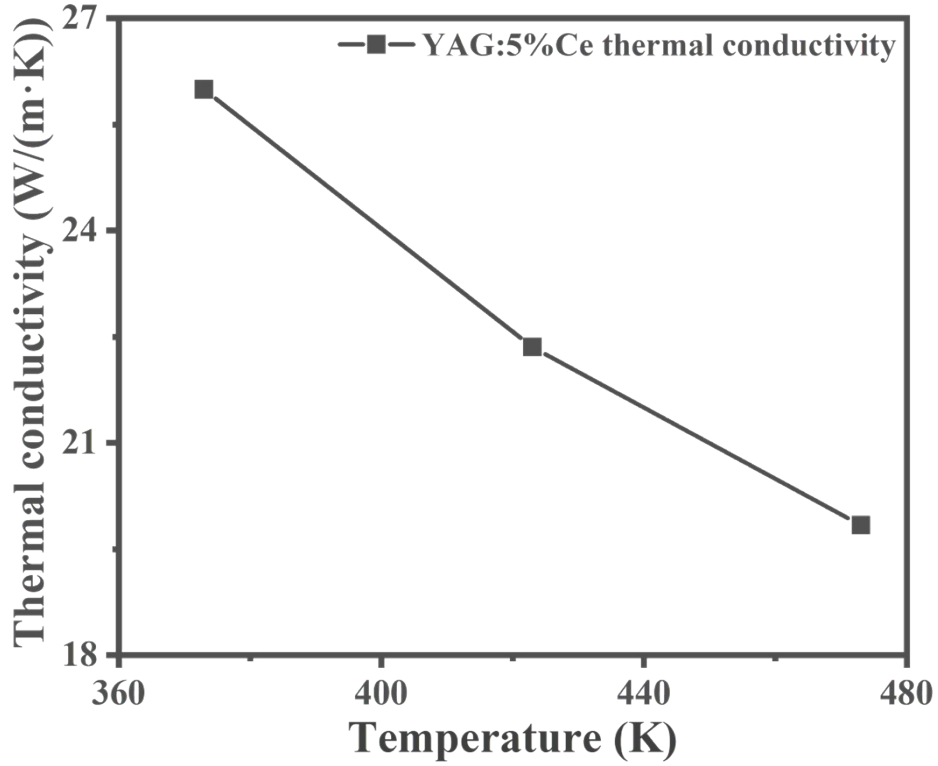

Fig. S12 Thermal conductivity of YAG: 5%Ce film.

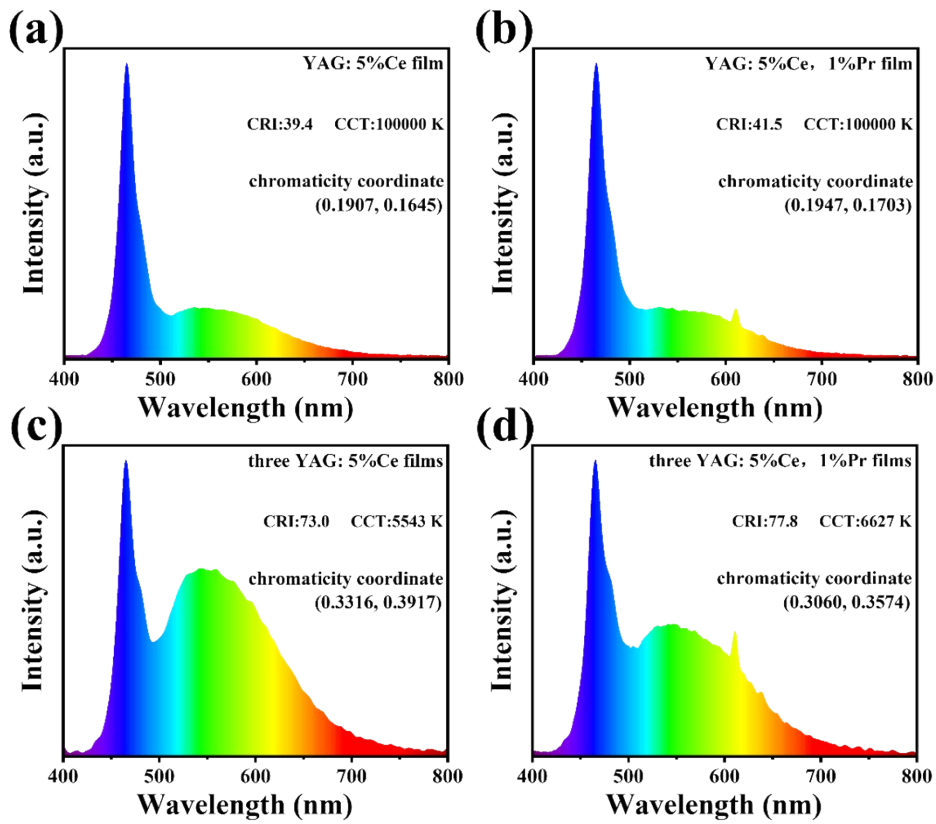

Fig. S13 EL spectra of one layer (a-b) and 3 layers (c-d) of YAG: RE (RE=Ce, Pr) transparent polycrystalline films.
